# Supplementary material for: Arginine methylation of USP9X promotes its interaction with TDRD3 and its anti-apoptotic activities in breast cancer cells
Source: PubMed Central journal article supplement (PMC5206711; doi:10.1038/celldisc.2016.48), 2017-01-03
Supplement: celldisc201648-s1.pdf [file celldisc201648-s1.pdf]

**Supplementary Information:**

**Arginine Methylation of USP9X Promotes its Interaction with TDRD3 and its Antiapoptotic Activities in Breast Cancer Cells**

Nithya Narayanan<sup>1</sup>, Zhihao Wang<sup>1</sup>, Ling Li<sup>2</sup>, & Yanzhong Yang<sup>1§</sup>

<sup>1</sup>Department of Cancer Genetics and Epigenetics, Beckman Research Institute, City of Hope Cancer Center, Duarte, CA 91010, USA

<sup>2</sup>Division of Hematopoietic Stem Cell & Leukemia Research, Department of Hematology and HCT, Beckman Research Institute, City of Hope Cancer Center, Duarte, CA 91010, USA

Contains 6 supplementary figures.

## Supplementary Figure S1

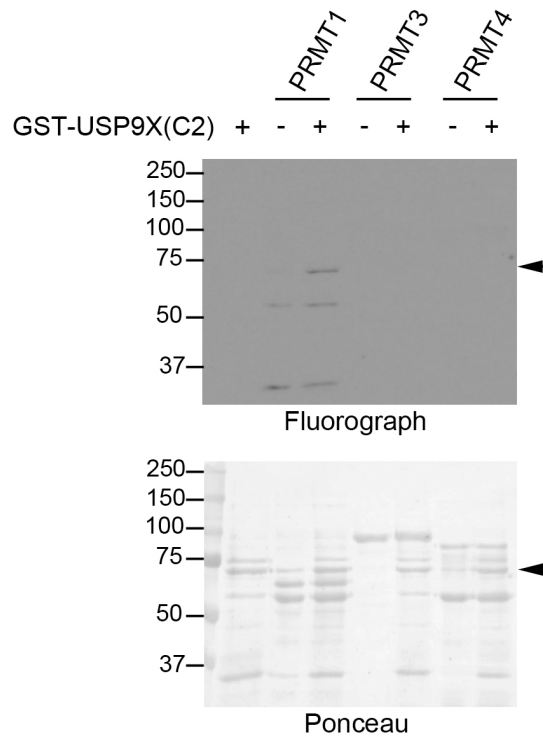

### Figure S1. USP9X is methylated by PRMT1 in vitro.

The recombinant GST-USP9X C2 fragment was incubated with PRMT1, PRMT3 and PRMT4 in the in vitro methylation reaction for 1 hour at 30 °C. The reaction samples were run on a SDS-PAGE gel and detected by radioautography. The membrane was stained with Ponceau to visualize the proteins.

## Supplementary Figure S2

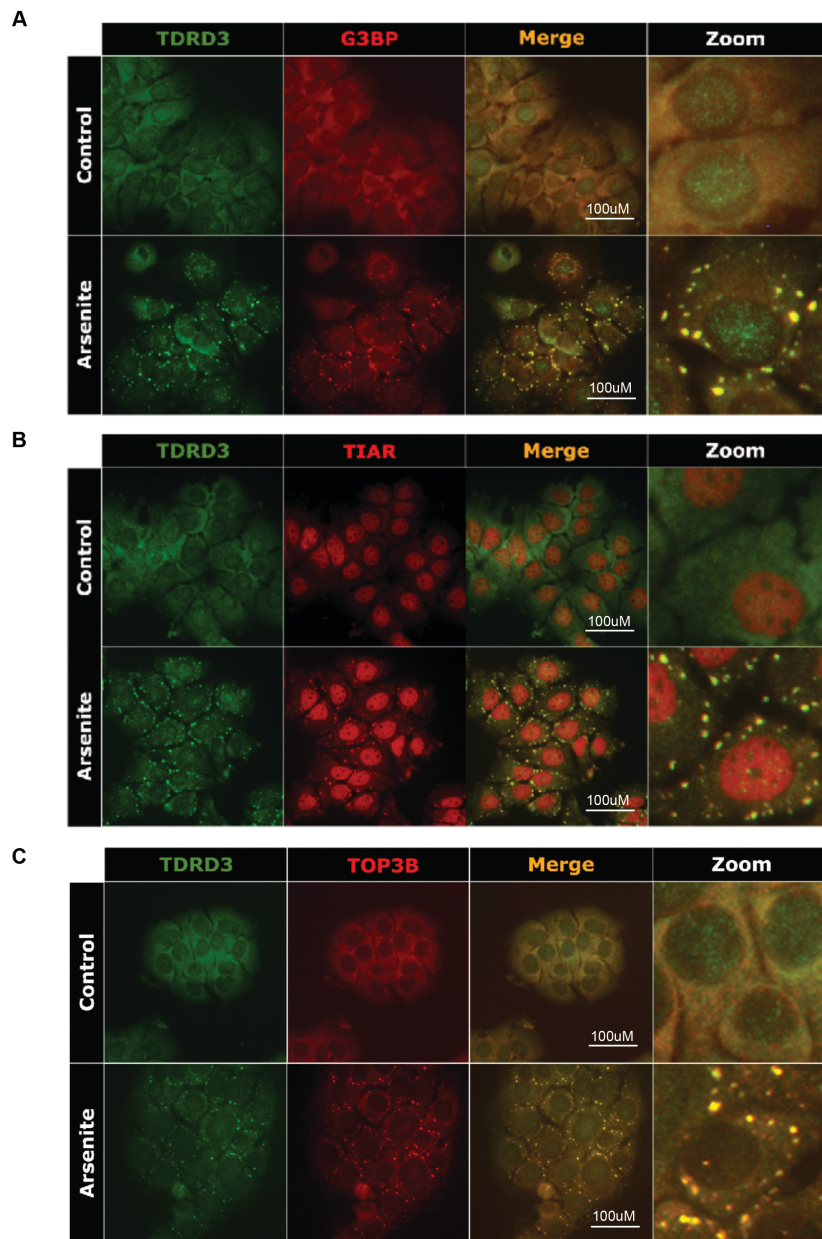

**Figure S2. TDRD3 co-localizes with G3BP, TIAR, and TOP3B in cytoplasmic SGs.**

**(A)** HeLa cells cultured on glass cover slips were left untreated (Control) or treated with 0.5 mM sodium arsenite (Arsenite) for 30 minutes. The cells were fixed and immunostained with anti-TDRD3 and anti-G3BP to detect the localization of endogenous proteins. DAPI was used to detect the nuclear DNA.

**(B)** HeLa cells were treated as in **(A)** and immunostained with anti-TDRD3 and anti-TIAR.

**(C)** HeLa cells were treated as in **(A)** and immunostained with anti-TDRD3 and anti-TOP3B.

### Supplementary Figure S3

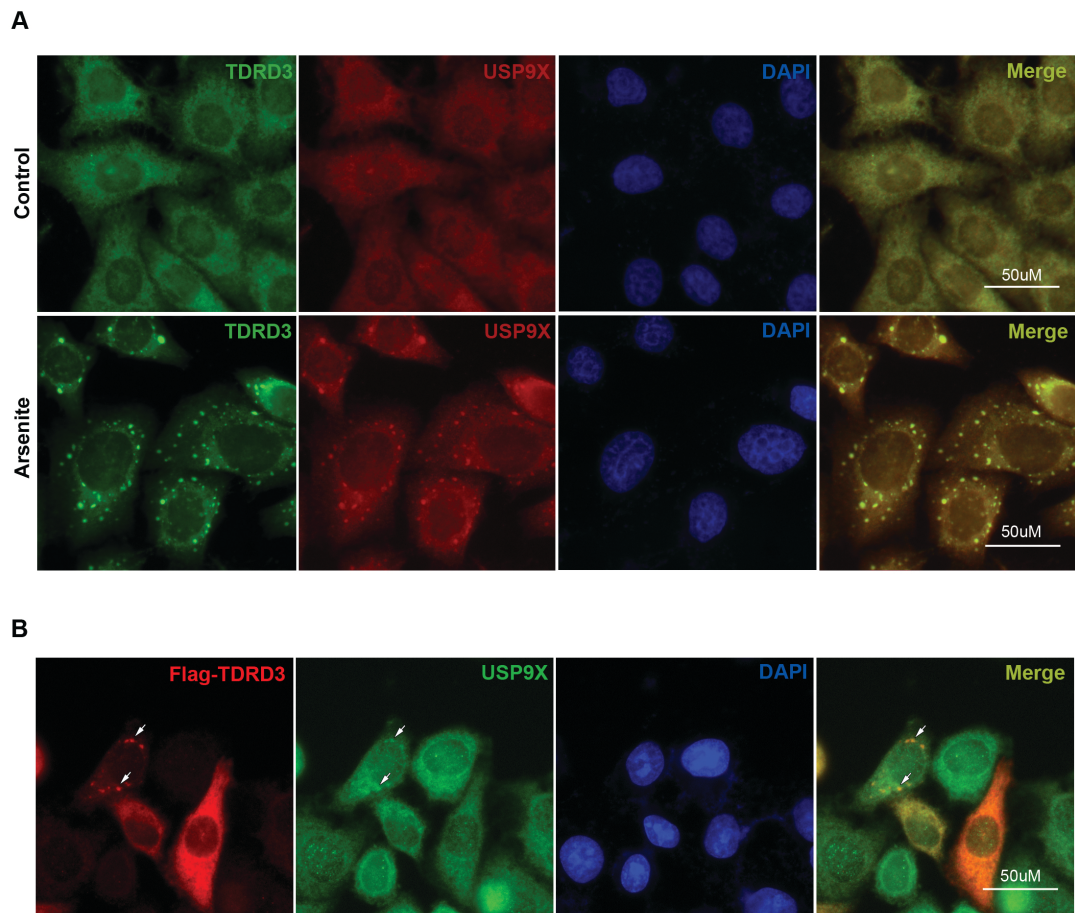

**Figure S3. TDRD3 and USP9X co-localize in cytoplasmic SGs.**

**(A)** HeLa cells cultured on glass cover slips were left untreated (Control) or treated with 0.5 mM sodium arsenite (Arsenite) for 30 minutes. The cells were fixed and immunostained with anti-USP9X (ab56461) and anti-TDRD3 to detect the localization of endogenous proteins. DAPI was used to detect the nuclear DNA.

**(B)** HeLa cells cultured on glass cover slips were transfected with FLAG-TDRD3 for 24 hours. The cells were fixed and immunostained with anti-FLAG and anti-USP9X antibodies to detect the localization of FLAG-TDRD3 and endogenous USP9X. DAPI was used to detect the nuclear DNA. The arrows indicate USP9X and FLAG-TDRD3 co-localization in SGs.



## Supplementary Figure S4

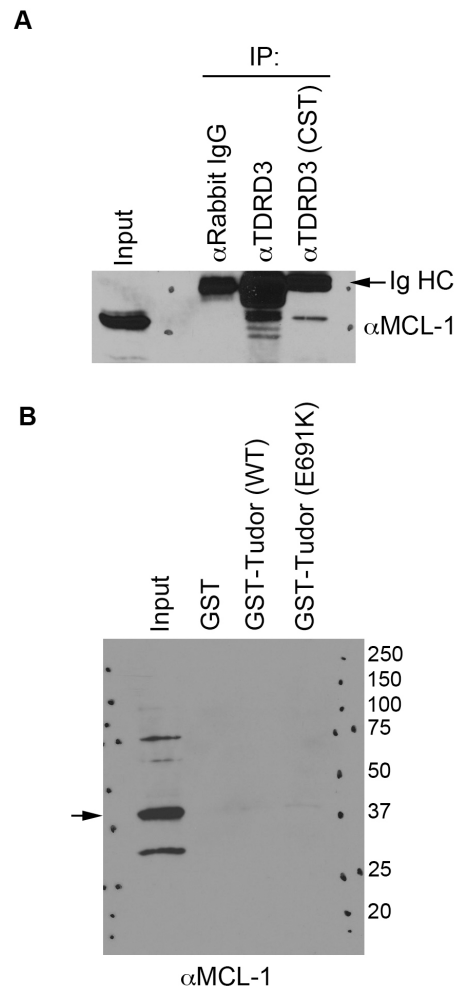

### Figure S4. TDRD3 interacts with MCL-1.

- (A)** TDRD3 co-IPs with MCL-1. Co-IP was performed as described in **Figure 1B**, and the IPed protein complex was detected by western blotting using anti-MCL-1. The arrow indicates the antibody heavy chain.
- (B)** The Tudor domain of TDRD3 does not interact with MCL-1. GST pull-down was performed as described in Figure 1A, and the pull-down samples were detected by western blotting using anti-MCL-1. The arrow indicates the MCL-1 protein.

## Supplementary Figure S5

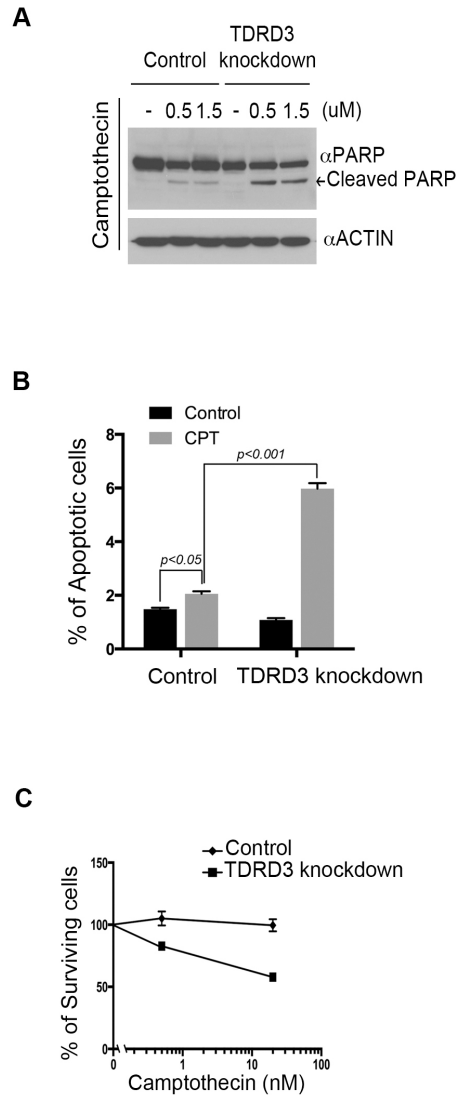

### Figure S5. TDRD3 knockdown sensitizes MDA-MB 231 cells to CPT-induced apoptosis.

- (A) Both control and Dox-inducible TDRD3 shRNA-expressing MDA-MB-231 cells were treated with increasing amounts of CPT for 24 hours. The total cell lysates were detected with anti-PARP by western blotting. Anti-ACTIN was a loading control.
- (B) Both control and TDRD3 knockdown MDA-MB 231 cells were treated with 0.5  $\mu$ M CPT for 24 hours. Apoptosis was measured by FACS analysis.
- (C) Both control and TDRD3 knockdown cells were cultured in the presence of 0.5 and 20 nM CPT for 48 hours. The cell viability was measured by cell counting.

## Supplementary Figure S6

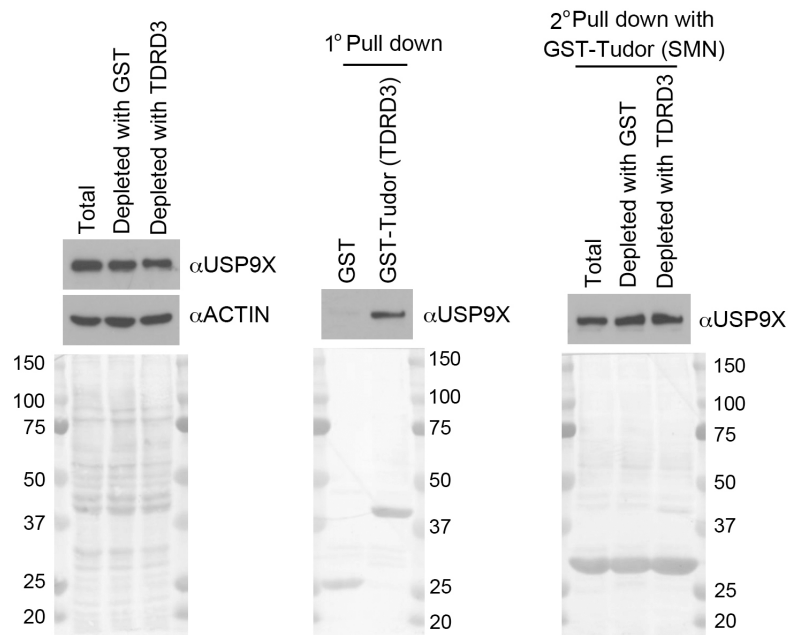

**Figure S6. TDRD3 and SMN interact with different pools of USP9X.**

GST pull-down experiments were performed using recombinant TDRD3 Tudor domain and SMN Tudor domain. HeLa cell total cell lysates were incubated first with GST or GST-Tudor (TDRD3) to deplete the TDRD3-interacting pool of USP9X ( $1^0$  pull-down). The corresponding supernatants from after GST or GST-Tudor (TDRD3) pull-down, together with equal amounts of fresh HeLa cell lysate, were incubated with GST-Tudor domain of SMN protein ( $2^0$  pull-down). The lysates and the pull-down samples were blotted with anti-USP9X. After western blotting, the PVDF membranes were stained with Ponceau S to monitor the loading.
